# Supplementary material for: Mapping Interdisciplinary Fields: Efficiencies, Gaps and Redundancies in HIV/AIDS Research
Source: PubMed Central journal article supplement (PMC4266665; doi:10.1371/journal.pone.0115092), 2014-12-15
Supplement: pone.0115092.s005.pdf [file pone.0115092.s005.pdf]

5

4

3 2 1

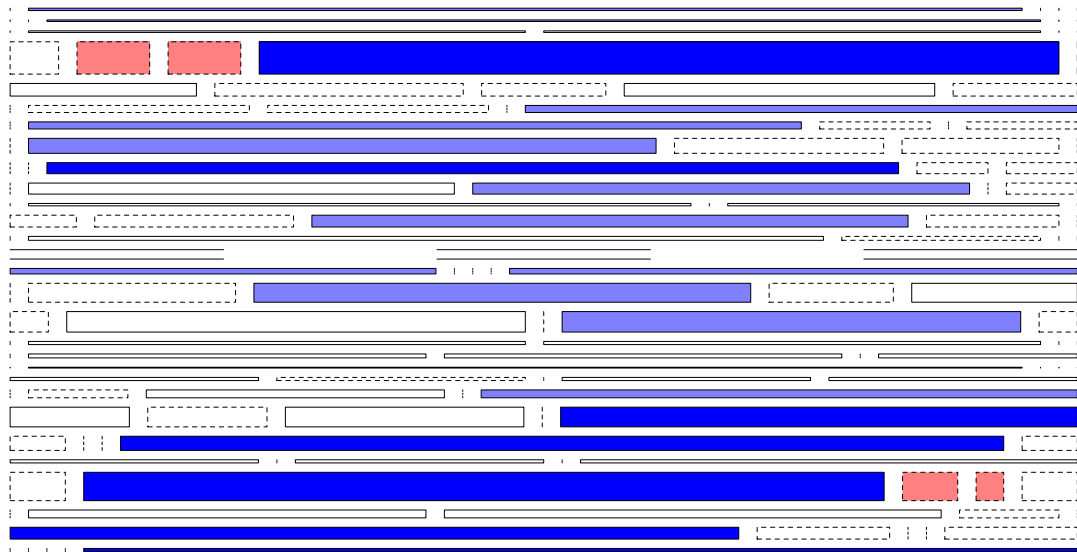

1  
2  
3  
4  
5  
6  
7  
8  
9  
10  
11  
12  
13  
14  
15  
16  
17  
18  
19  
20  
21  
22  
23  
24  
25  
26  
27  
28  
29  
30

1991

5

4

3

2

1

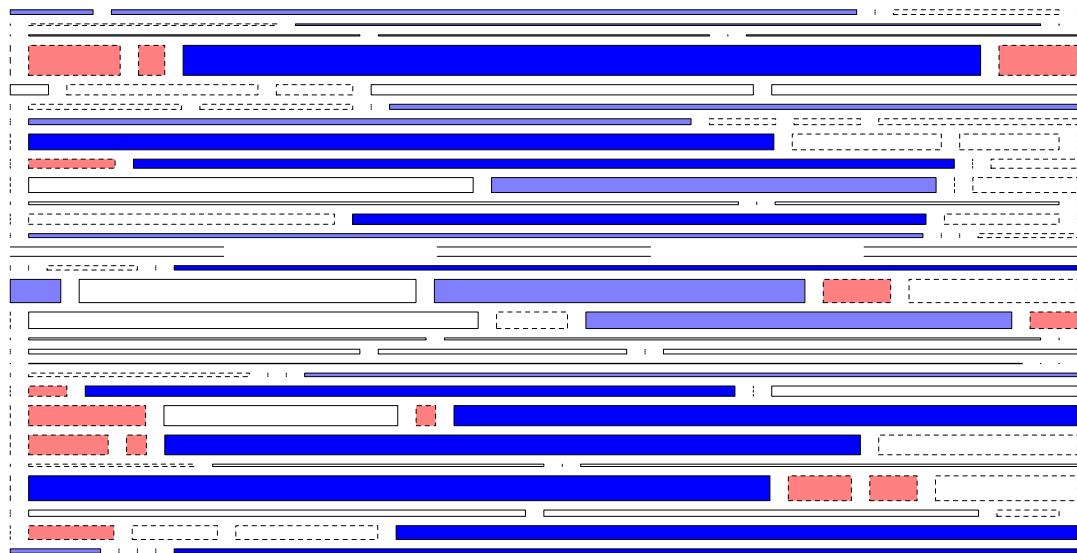

1  
2  
3  
4  
5  
6  
7  
8  
9  
10  
11  
12  
13  
14  
15  
16  
17  
18  
19  
20  
21  
22  
23  
24  
25  
26  
27  
28  
29  
30

1992

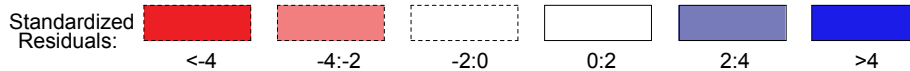

**Topic Key:**

|                         |                              |                         |
|-------------------------|------------------------------|-------------------------|
| 1. Drug Metabolism      | 11. Drug Failures            | 21. Treatment           |
| 2. ARV1                 | 12. Neuropathy               | 22. Genetic Variability |
| 3. Hepatitis            | 13. Survival                 | 23. Transmission1       |
| 4. Replication Blocking | 14. Methods1                 | 24. Testing Assays      |
| 5. Animal Models        | 15. Clinical Trials          | 25. Vaccine             |
| 6. Africa               | 16. PMTCT                    | 26. Prevalence          |
| 7. Methods2             | 17. Opportunistic Infections | 27. Symptomatology      |
| 8. ARV3                 | 18. Immunity                 | 28. Oncology            |
| 9. Transmission3        | 19. ARV2                     | 29. PCR                 |
| 10. Race & Gender       | 20. Cost Effectiveness       | 30. Transmission2       |

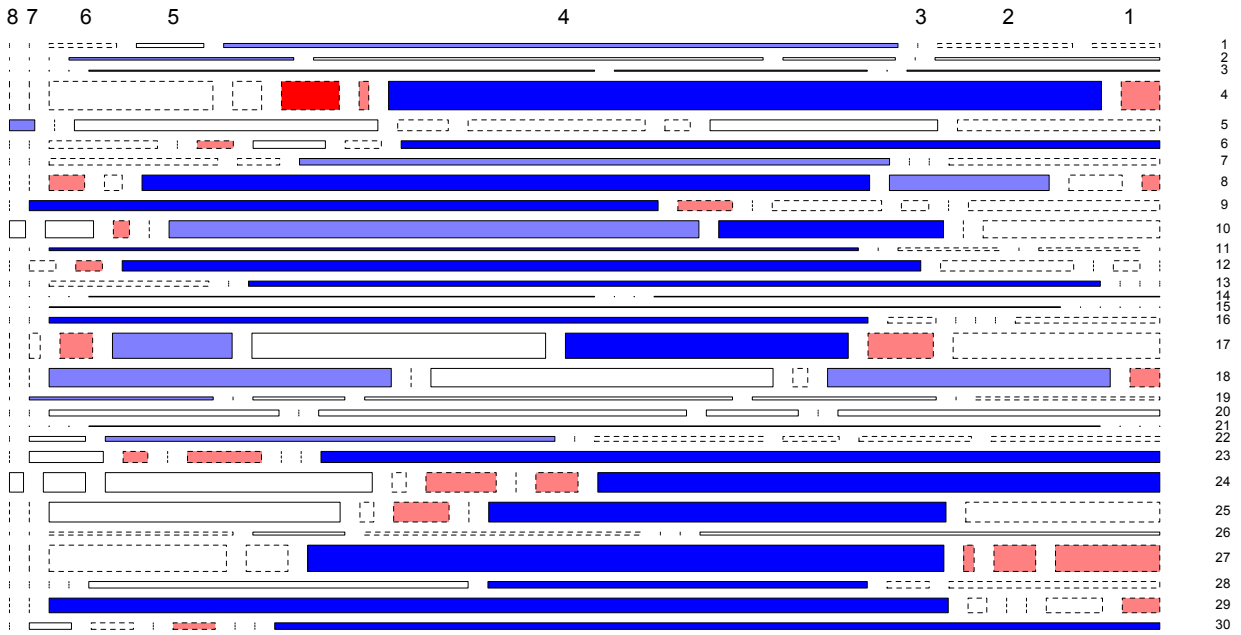

1993

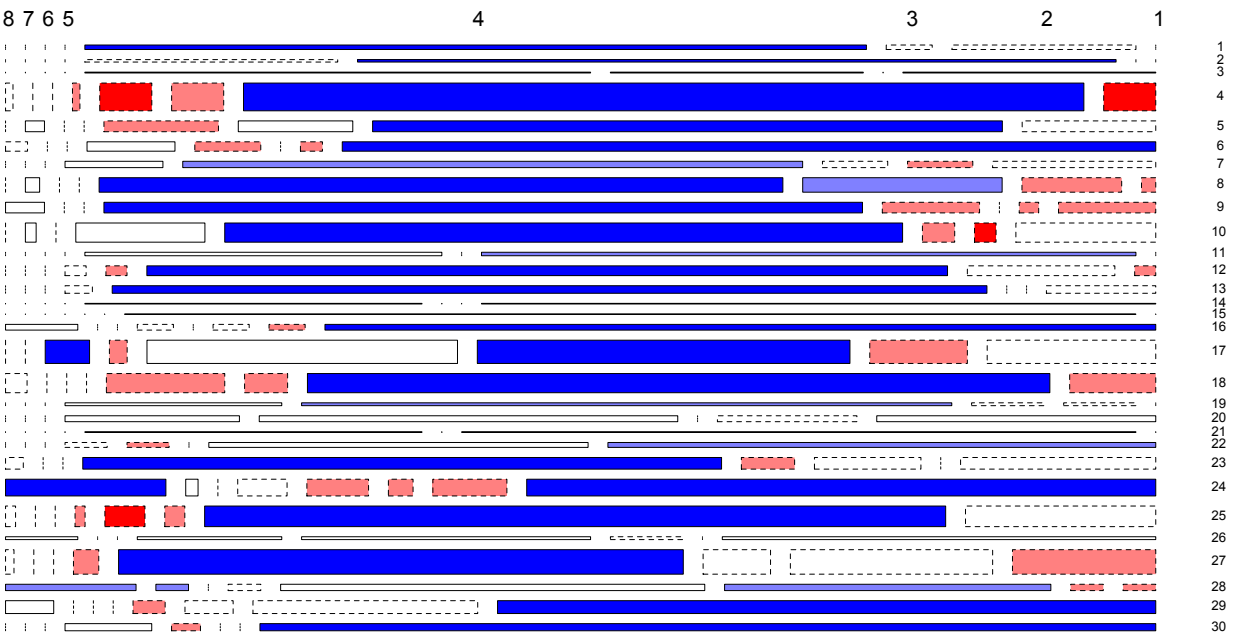

1994

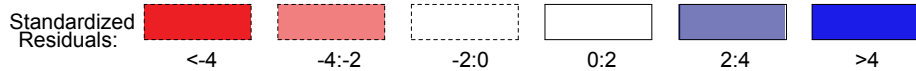

| Topic Key:              |                              |                         |
|-------------------------|------------------------------|-------------------------|
| 1. Drug Metabolism      | 11. Drug Failures            | 21. Treatment           |
| 2. ARV1                 | 12. Neuropathy               | 22. Genetic Variability |
| 3. Hepatitis            | 13. Survival                 | 23. Transmission1       |
| 4. Replication Blocking | 14. Methods1                 | 24. Testing Assays      |
| 5. Animal Models        | 15. Clinical Trials          | 25. Vaccine             |
| 6. Africa               | 16. PMTCT                    | 26. Prevalence          |
| 7. Methods2             | 17. Opportunistic Infections | 27. Symptomatology      |
| 8. ARV3                 | 18. Immunity                 | 28. Oncology            |
| 9. Transmission3        | 19. ARV2                     | 29. PCR                 |
| 10. Race & Gender       | 20. Cost Effectiveness       | 30. Transmission2       |

7 6 5

4

3

2

1

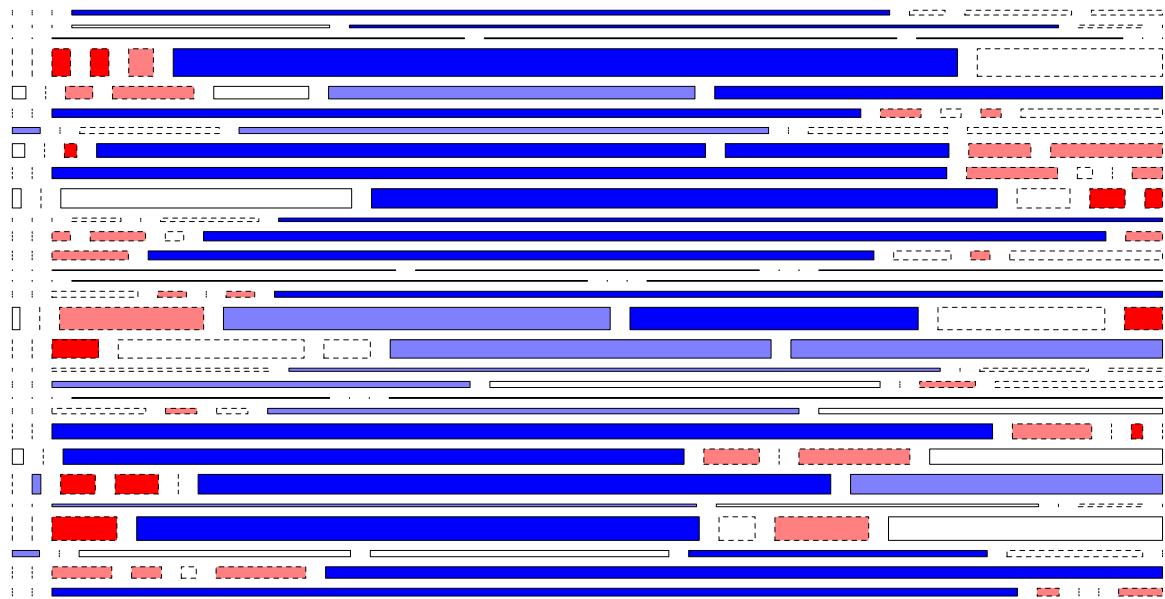

1  
2  
3  
4  
5  
6  
7  
8  
9  
10  
11  
12  
13  
14  
15  
16  
17  
18  
19  
20  
21  
22  
23  
24  
25  
26  
27  
28  
29  
30

1995

8 7 6 5

4

3

2

1

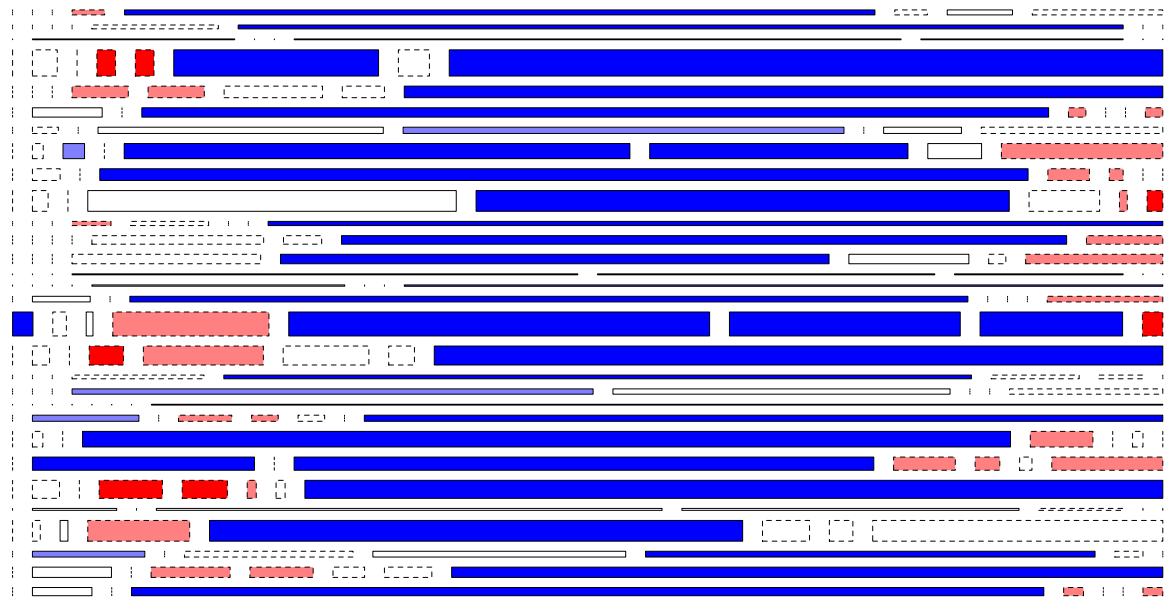

1  
2  
3  
4  
5  
6  
7  
8  
9  
10  
11  
12  
13  
14  
15  
16  
17  
18  
19  
20  
21  
22  
23  
24  
25  
26  
27  
28  
29  
30

1996

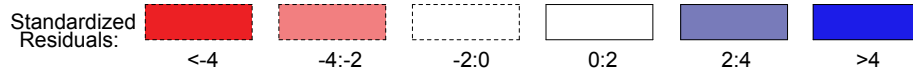

| Topic Key:              |                              |                         |
|-------------------------|------------------------------|-------------------------|
| 1. Drug Metabolism      | 11. Drug Failures            | 21. Treatment           |
| 2. ARV1                 | 12. Neuropathy               | 22. Genetic Variability |
| 3. Hepatitis            | 13. Survival                 | 23. Transmission1       |
| 4. Replication Blocking | 14. Methods1                 | 24. Testing Assays      |
| 5. Animal Models        | 15. Clinical Trials          | 25. Vaccine             |
| 6. Africa               | 16. PMTCT                    | 26. Prevalence          |
| 7. Methods2             | 17. Opportunistic Infections | 27. Symptomatology      |
| 8. ARV3                 | 18. Immunity                 | 28. Oncology            |
| 9. Transmission3        | 19. ARV2                     | 29. PCR                 |
| 10. Race & Gender       | 20. Cost Effectiveness       | 30. Transmission2       |

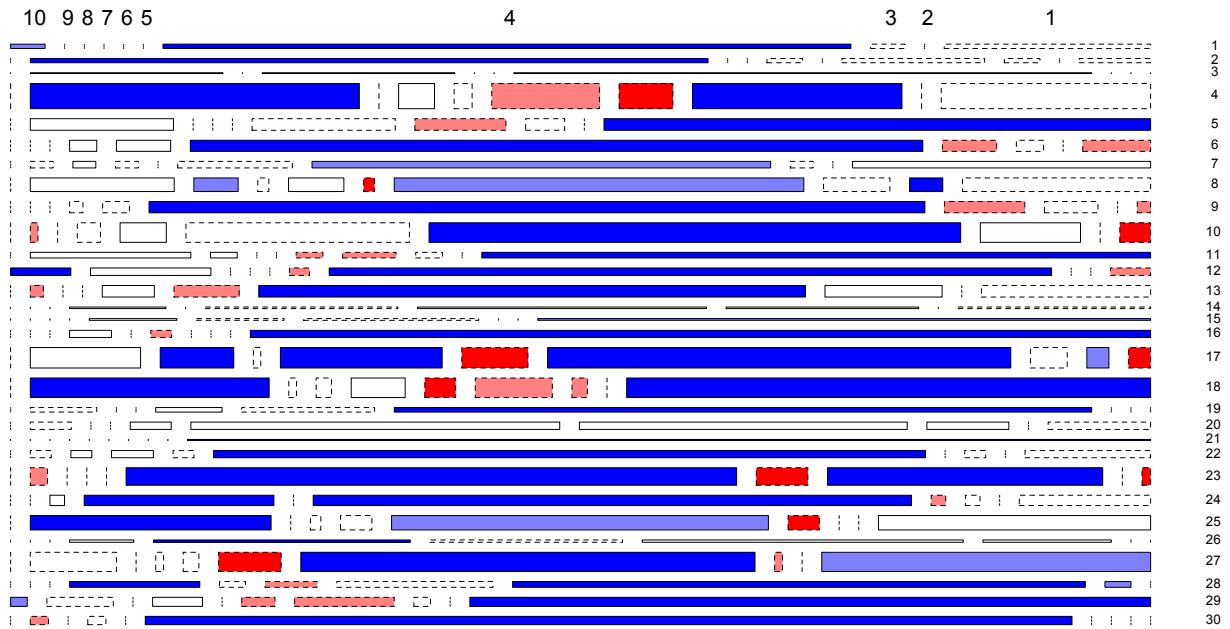

1997

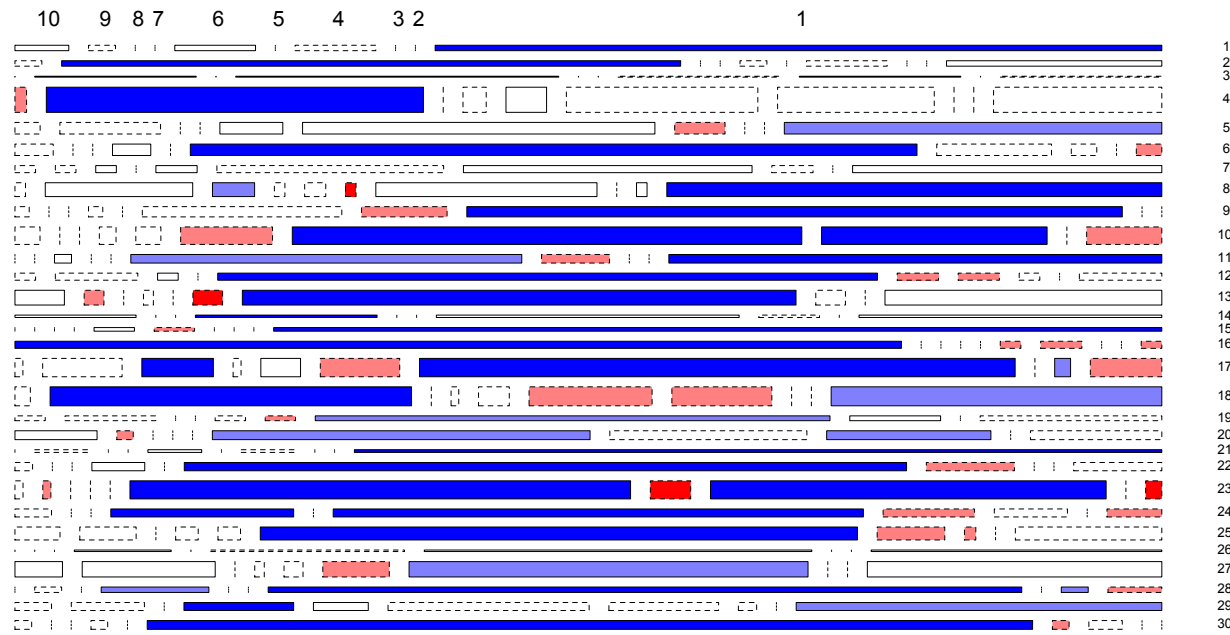

1998

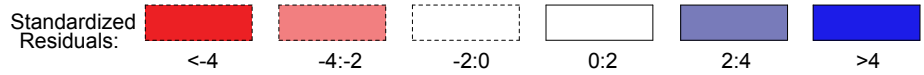

**Topic Key:**

|                         |                              |                         |
|-------------------------|------------------------------|-------------------------|
| 1. Drug Metabolism      | 11. Drug Failures            | 21. Treatment           |
| 2. ARV1                 | 12. Neuropathy               | 22. Genetic Variability |
| 3. Hepatitis            | 13. Survival                 | 23. Transmission1       |
| 4. Replication Blocking | 14. Methods1                 | 24. Testing Assays      |
| 5. Animal Models        | 15. Clinical Trials          | 25. Vaccine             |
| 6. Africa               | 16. PMTCT                    | 26. Prevalence          |
| 7. Methods2             | 17. Opportunistic Infections | 27. Symptomatology      |
| 8. ARV3                 | 18. Immunity                 | 28. Oncology            |
| 9. Transmission3        | 19. ARV2                     | 29. PCR                 |
| 10. Race & Gender       | 20. Cost Effectiveness       | 30. Transmission2       |

8 7 6 5

4

3

2

1

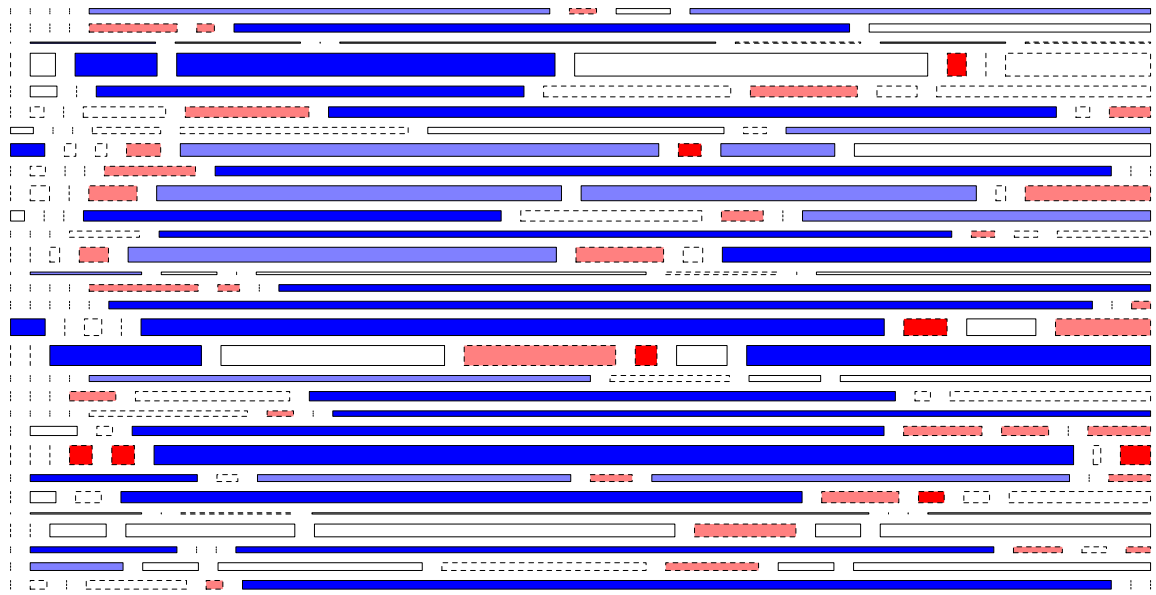

1  
2  
3  
4  
5  
6  
7  
8  
9  
10  
11  
12  
13  
14  
15  
16  
17  
18  
19  
20  
21  
22  
23  
24  
25  
26  
27  
28  
29  
30

1999

8 7

6

5

4

3

2

1

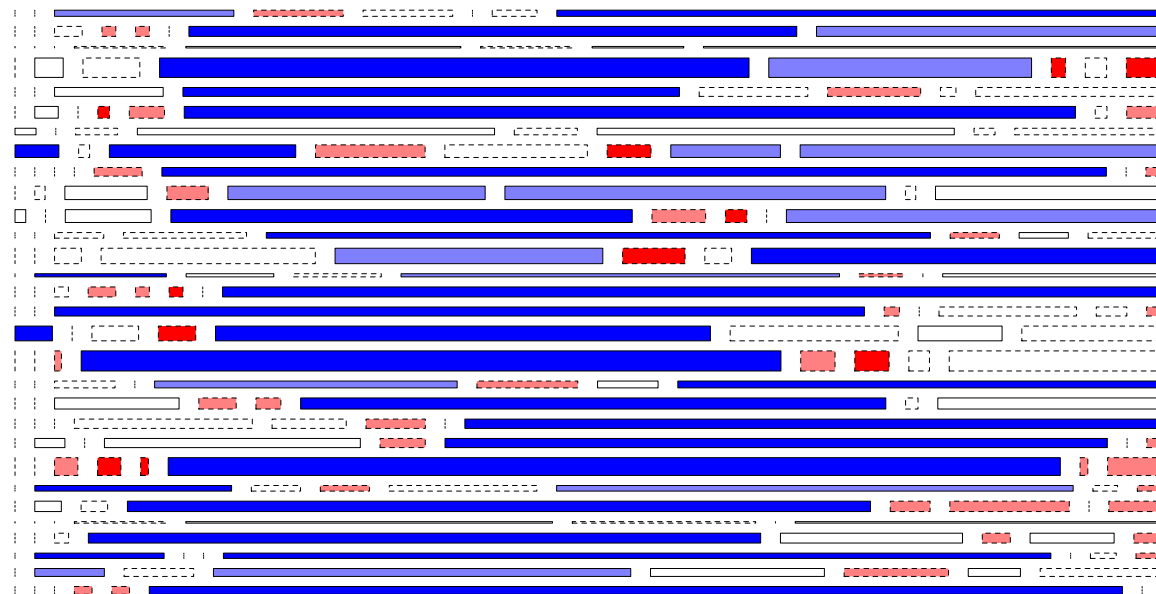

1  
2  
3  
4  
5  
6  
7  
8  
9  
10  
11  
12  
13  
14  
15  
16  
17  
18  
19  
20  
21  
22  
23  
24  
25  
26  
27  
28  
29  
30

2000

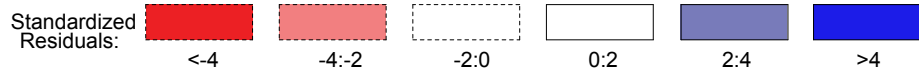

| Topic Key:              |                              |                         |
|-------------------------|------------------------------|-------------------------|
| 1. Drug Metabolism      | 11. Drug Failures            | 21. Treatment           |
| 2. ARV1                 | 12. Neuropathy               | 22. Genetic Variability |
| 3. Hepatitis            | 13. Survival                 | 23. Transmission1       |
| 4. Replication Blocking | 14. Methods1                 | 24. Testing Assays      |
| 5. Animal Models        | 15. Clinical Trials          | 25. Vaccine             |
| 6. Africa               | 16. PMTCT                    | 26. Prevalence          |
| 7. Methods2             | 17. Opportunistic Infections | 27. Symptomatology      |
| 8. ARV3                 | 18. Immunity                 | 28. Oncology            |
| 9. Transmission3        | 19. ARV2                     | 29. PCR                 |
| 10. Race & Gender       | 20. Cost Effectiveness       | 30. Transmission2       |

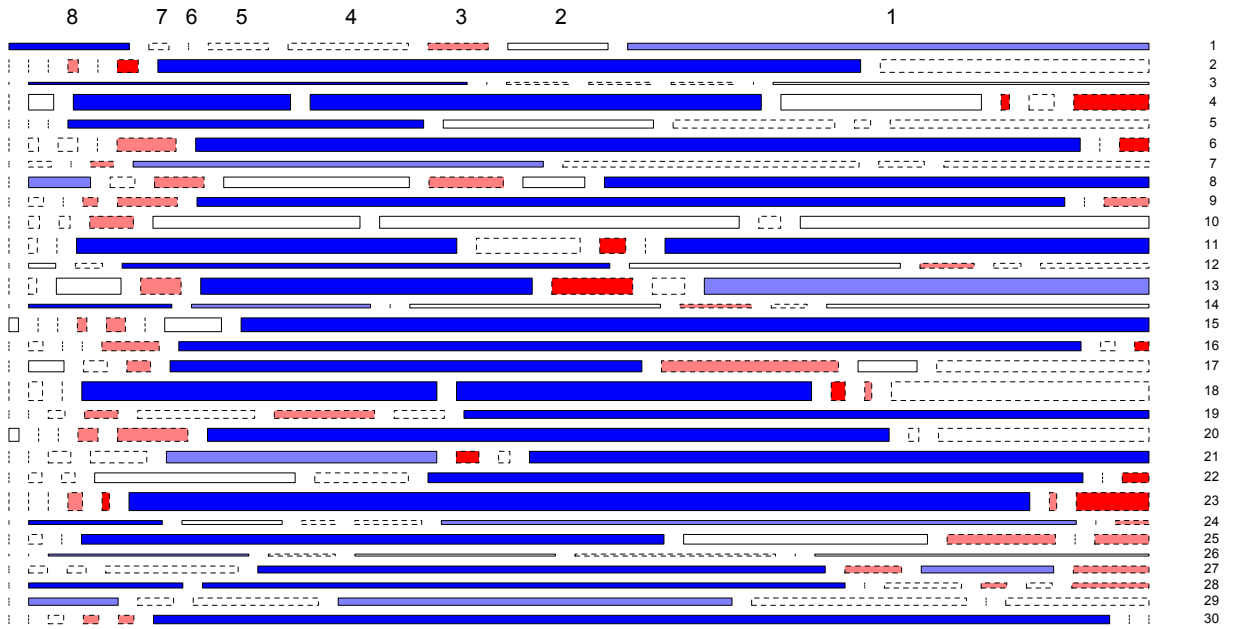

2001

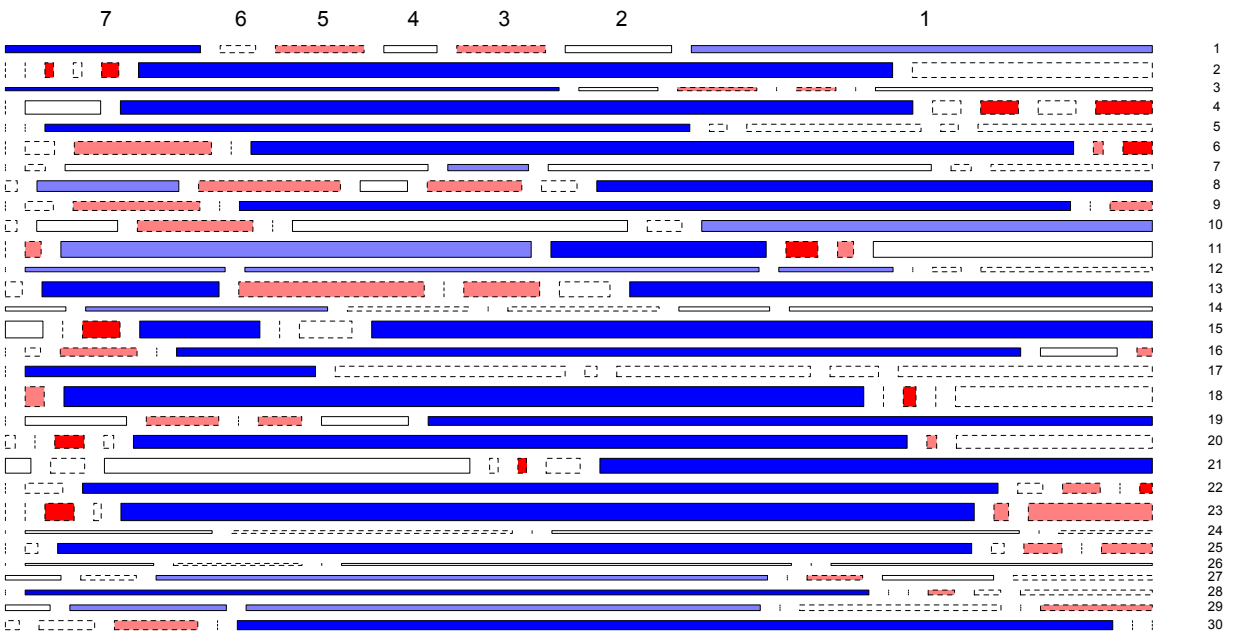

2002

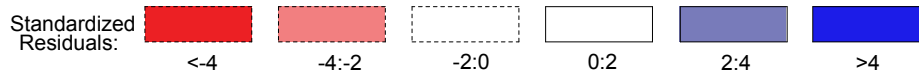

| Topic Key:              |                              |                         |
|-------------------------|------------------------------|-------------------------|
| 1. Drug Metabolism      | 11. Drug Failures            | 21. Treatment           |
| 2. ARV1                 | 12. Neuropathy               | 22. Genetic Variability |
| 3. Hepatitis            | 13. Survival                 | 23. Transmission1       |
| 4. Replication Blocking | 14. Methods1                 | 24. Testing Assays      |
| 5. Animal Models        | 15. Clinical Trials          | 25. Vaccine             |
| 6. Africa               | 16. PMTCT                    | 26. Prevalence          |
| 7. Methods2             | 17. Opportunistic Infections | 27. Symptomatology      |
| 8. ARV3                 | 18. Immunity                 | 28. Oncology            |
| 9. Transmission3        | 19. ARV2                     | 29. PCR                 |
| 10. Race & Gender       | 20. Cost Effectiveness       | 30. Transmission2       |

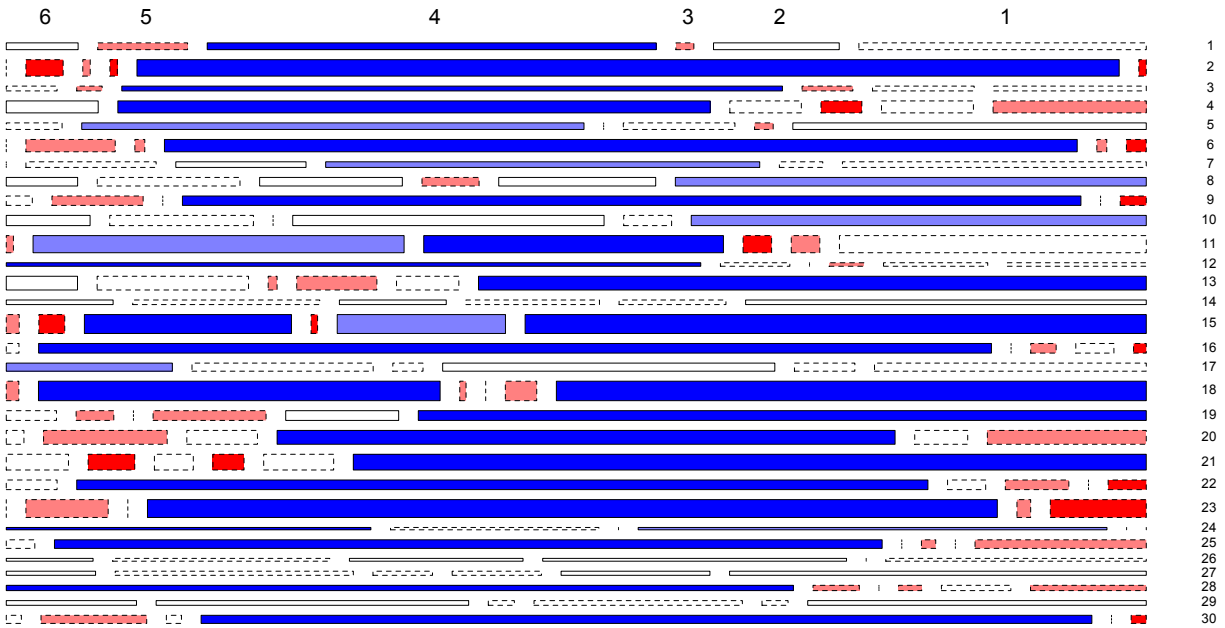

2003

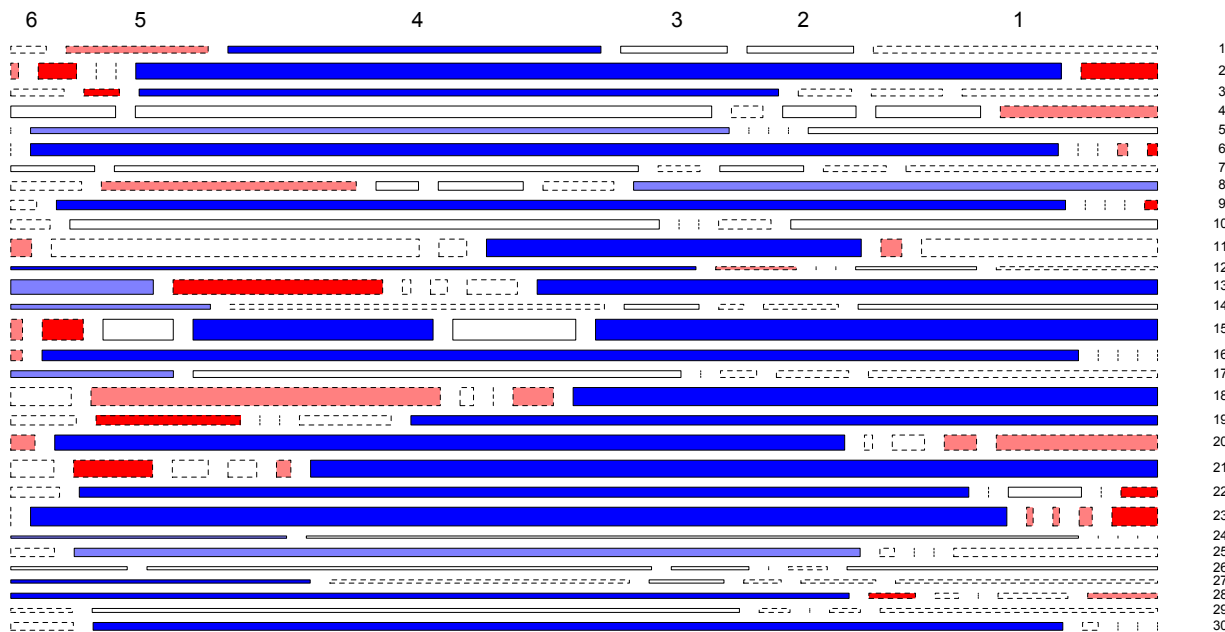

2004

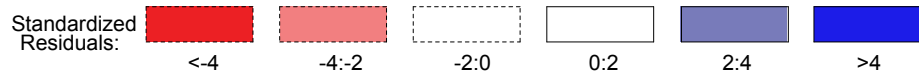

| Topic Key:              |                              |                         |
|-------------------------|------------------------------|-------------------------|
| 1. Drug Metabolism      | 11. Drug Failures            | 21. Treatment           |
| 2. ARV1                 | 12. Neuropathy               | 22. Genetic Variability |
| 3. Hepatitis            | 13. Survival                 | 23. Transmission1       |
| 4. Replication Blocking | 14. Methods1                 | 24. Testing Assays      |
| 5. Animal Models        | 15. Clinical Trials          | 25. Vaccine             |
| 6. Africa               | 16. PMTCT                    | 26. Prevalence          |
| 7. Methods2             | 17. Opportunistic Infections | 27. Symptomatology      |
| 8. ARV3                 | 18. Immunity                 | 28. Oncology            |
| 9. Transmission3        | 19. ARV2                     | 29. PCR                 |
| 10. Race & Gender       | 20. Cost Effectiveness       | 30. Transmission2       |

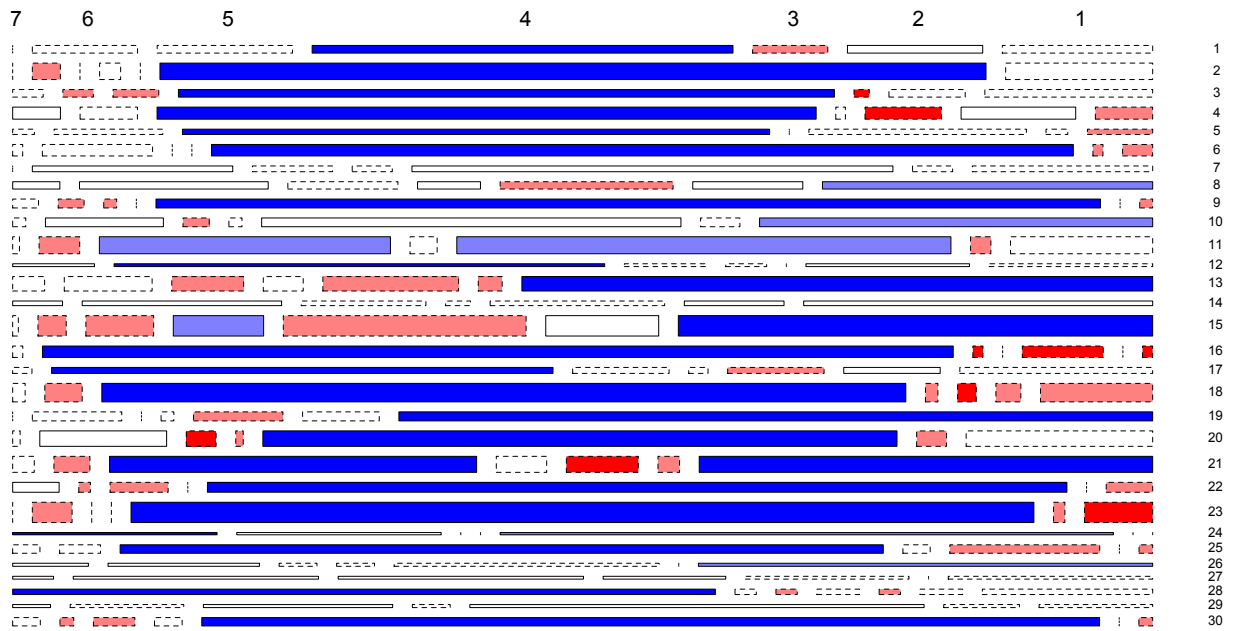

2005

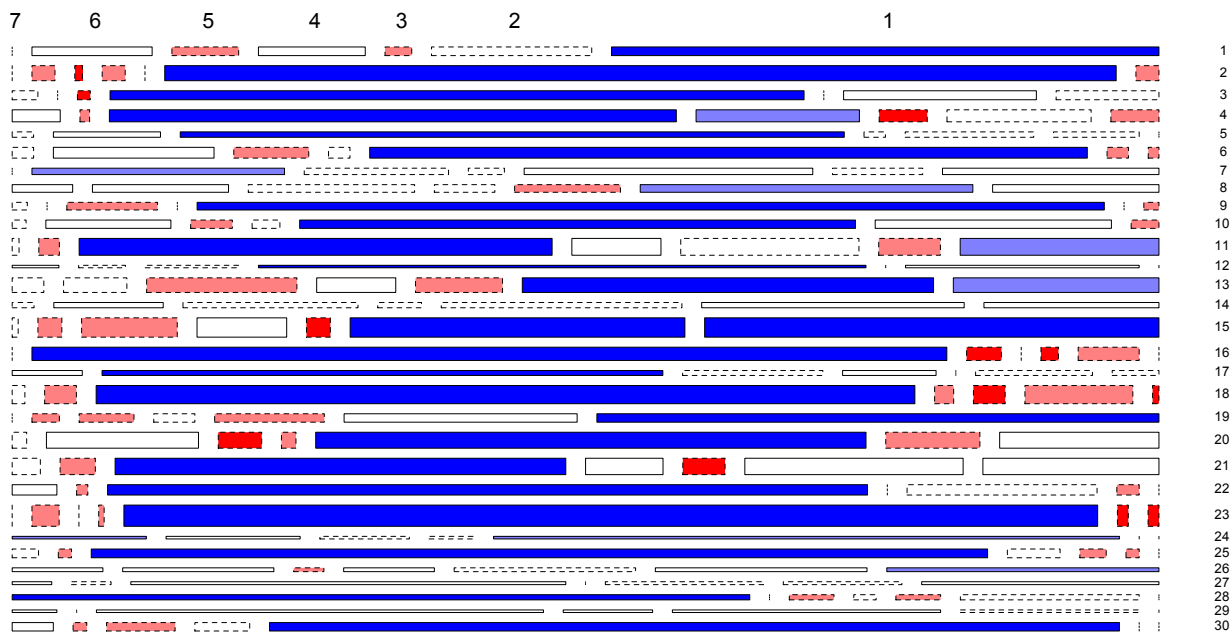

2006

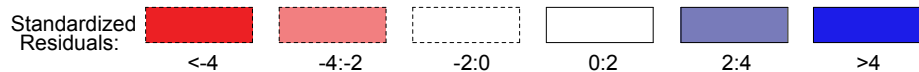

| Topic Key:              |                              |                         |
|-------------------------|------------------------------|-------------------------|
| 1. Drug Metabolism      | 11. Drug Failures            | 21. Treatment           |
| 2. ARV1                 | 12. Neuropathy               | 22. Genetic Variability |
| 3. Hepatitis            | 13. Survival                 | 23. Transmission1       |
| 4. Replication Blocking | 14. Methods1                 | 24. Testing Assays      |
| 5. Animal Models        | 15. Clinical Trials          | 25. Vaccine             |
| 6. Africa               | 16. PMTCT                    | 26. Prevalence          |
| 7. Methods2             | 17. Opportunistic Infections | 27. Symptomatology      |
| 8. ARV3                 | 18. Immunity                 | 28. Oncology            |
| 9. Transmission3        | 19. ARV2                     | 29. PCR                 |
| 10. Race & Gender       | 20. Cost Effectiveness       | 30. Transmission2       |



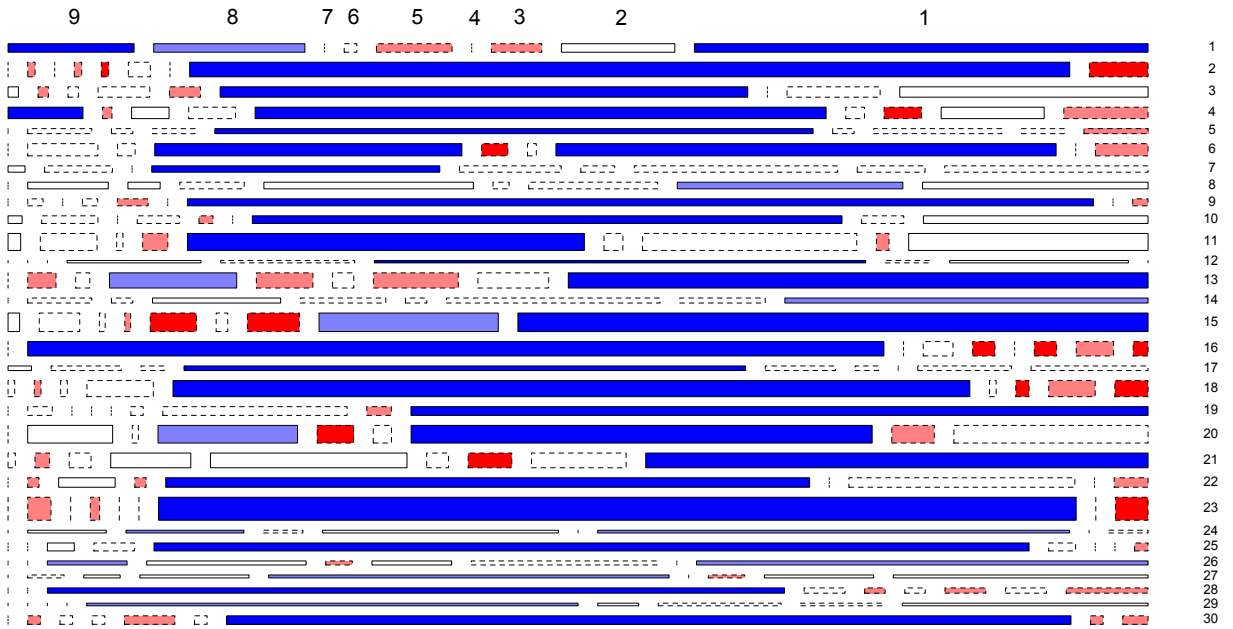

2007

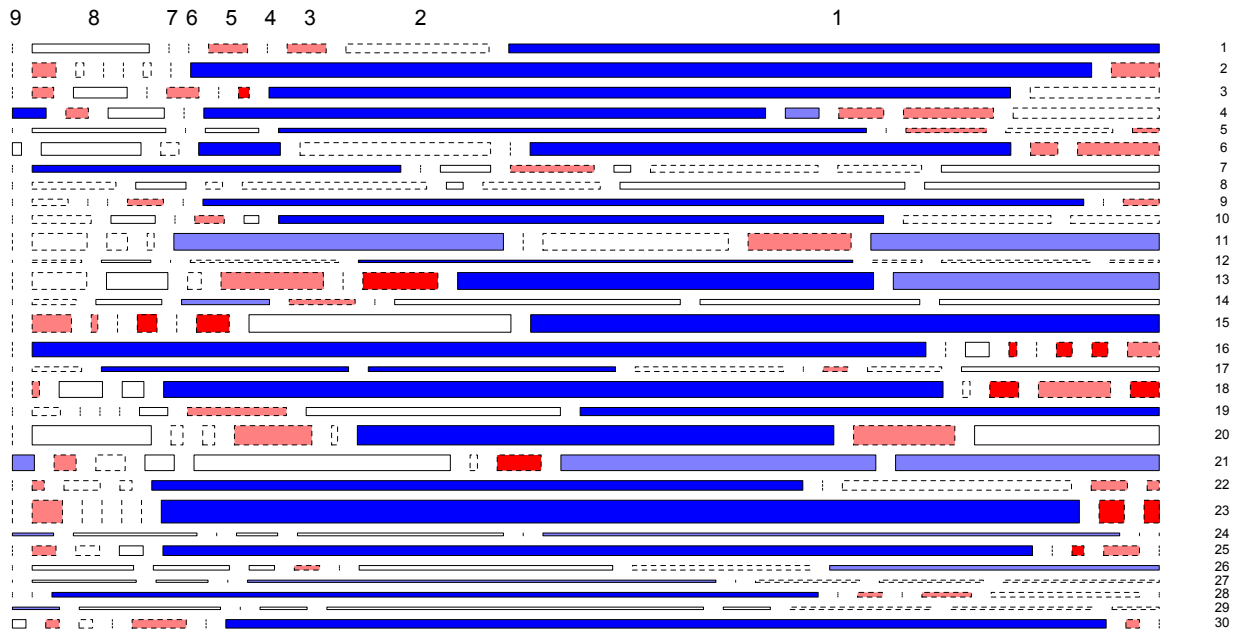

2008

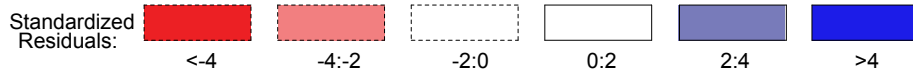

| Topic Key:              |                              |                         |
|-------------------------|------------------------------|-------------------------|
| 1. Drug Metabolism      | 11. Drug Failures            | 21. Treatment           |
| 2. ARV1                 | 12. Neuropathy               | 22. Genetic Variability |
| 3. Hepatitis            | 13. Survival                 | 23. Transmission1       |
| 4. Replication Blocking | 14. Methods1                 | 24. Testing Assays      |
| 5. Animal Models        | 15. Clinical Trials          | 25. Vaccine             |
| 6. Africa               | 16. PMTCT                    | 26. Prevalence          |
| 7. Methods2             | 17. Opportunistic Infections | 27. Symptomatology      |
| 8. ARV3                 | 18. Immunity                 | 28. Oncology            |
| 9. Transmission3        | 19. ARV2                     | 29. PCR                 |
| 10. Race & Gender       | 20. Cost Effectiveness       | 30. Transmission2       |
