# Supplementary material for: Mapping Interdisciplinary Fields: Efficiencies, Gaps and Redundancies in HIV/AIDS Research
Source: PubMed Central journal article supplement (PMC4266665; doi:10.1371/journal.pone.0115092), 2014-12-15
Supplement: pone.0115092.s006.pdf [file pone.0115092.s006.pdf]

| <b>Label</b>             | <b>Brief Description</b>                                                             |
|--------------------------|--------------------------------------------------------------------------------------|
| Africa                   | Socio/behavioral Risk factors of HIV in Africa                                       |
| Animal Models            | Animal Models of HIV/AIDS progression                                                |
| ARV1                     | Metabolic complications of antiretroviral treatments                                 |
| ARV2                     | Determinants of adherence to antiretroviral drug treatment                           |
| ARV3                     | Toxicities of antiretroviral drugs in clinical trials                                |
| Clinical Trials          | Clinical testing of anti-HIV drugs                                                   |
| Cost Effectiveness       | HIV mitigation program cost effectiveness tradeoffs                                  |
| Drug Failures            | Failure of therapy/drug resistance                                                   |
| Drug metabolism          | Metabolism of anti-HIV drugs                                                         |
| Genetic variability      | Genetic variability and evolution of HIV worldwide                                   |
| Hepatitis                | Clinical interactions of HIV and viral hepatitis infections                          |
| Immunity                 | Cellular immunity against HIV                                                        |
| Methods1                 | Lab-focused methodological approaches                                                |
| Methods2                 | Quantitative/Statistical methodological approaches                                   |
| Neuropathy               | Neurologic complications of HIV infection                                            |
| Oncology                 | Oncologic complications of HIV                                                       |
| Opportunistic Infections | AIDS-related opportunistic infections                                                |
| PCR                      | HIV detection and quantification methods                                             |
| PMTCT                    | Preventing mother to child (vertical) transmission                                   |
| Prevalence               | HIV/AIDS prevalence estimation & surveillance                                        |
| Race/Gender              | US-based demographic prevalence differences (race/gender)                            |
| Replication Blocking     | Molecular strategies to block HIV replication                                        |
| Survival                 | Survival of people living with HIV/AIDS (PLWHA)                                      |
| Symptomatology           | HIV-specific morbidity / symptomatology                                              |
| Testing assays           | HIV diagnostics                                                                      |
| Transmission1            | Risk factors associated with sexual transmission                                     |
| Transmission2            | "High risk" sexual transmission associated w/ commercial sex work & STD co-infection |
| Transmission3            | Intravenous drug use -based transmission                                             |
| Treatment                | Efficacy of treatment                                                                |
| Vaccine                  | Vaccine strategies for HIV                                                           |
